# Supplementary material for: Investigation of etravirine uptake and distribution in single aortic endothelial cells in vitro using Raman imaging
Source: Royal Society of Chemistry journal article supplement (doi:10.1039/d4an00314d), 2024-01-01
Supplement: d4an00314d1.pdf [file d4an00314d1.pdf]

## Supplementary information

### Investigation of etravirine uptake and distribution in single aortic endothelial cells *in vitro* means by Raman imaging

Jagoda Orleanska,<sup>abc</sup> Wiktoria Wiecek,<sup>a</sup> and Katarzyna Majzner,<sup>\*a</sup>

<sup>a</sup> Jagiellonian University in Krakow, Faculty of Chemistry, Department of Chemical Physics, Gronostajowa 2 St, 30-387 Krakow, Poland.

<sup>b</sup> Jagiellonian University in Krakow, Doctoral School of Exact and Natural Sciences, Prof. St. Lojasiewicza St 11, 30-348 Krakow, Poland.

<sup>c</sup> Jagiellonian University in Krakow, Jagiellonian Centre for Experimental Therapeutics (JCET), Bobrzynskiego St 14, 30-348 Krakow, Poland.

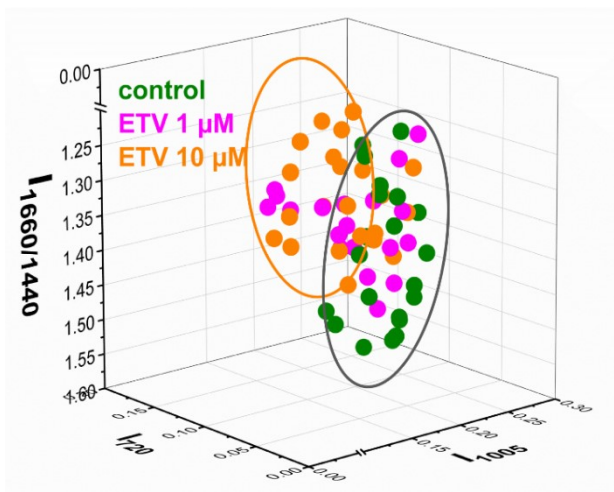

**Fig. S1.** Representation of diversity in biochemical information of perinuclear area, between control, and ETV-treated cells with 1 and 10  $\mu\text{M}$ , based on integral intensity analysis, for Raman bands: 720, 1005 and ratio 1660/1440  $\text{cm}^{-1}$ .

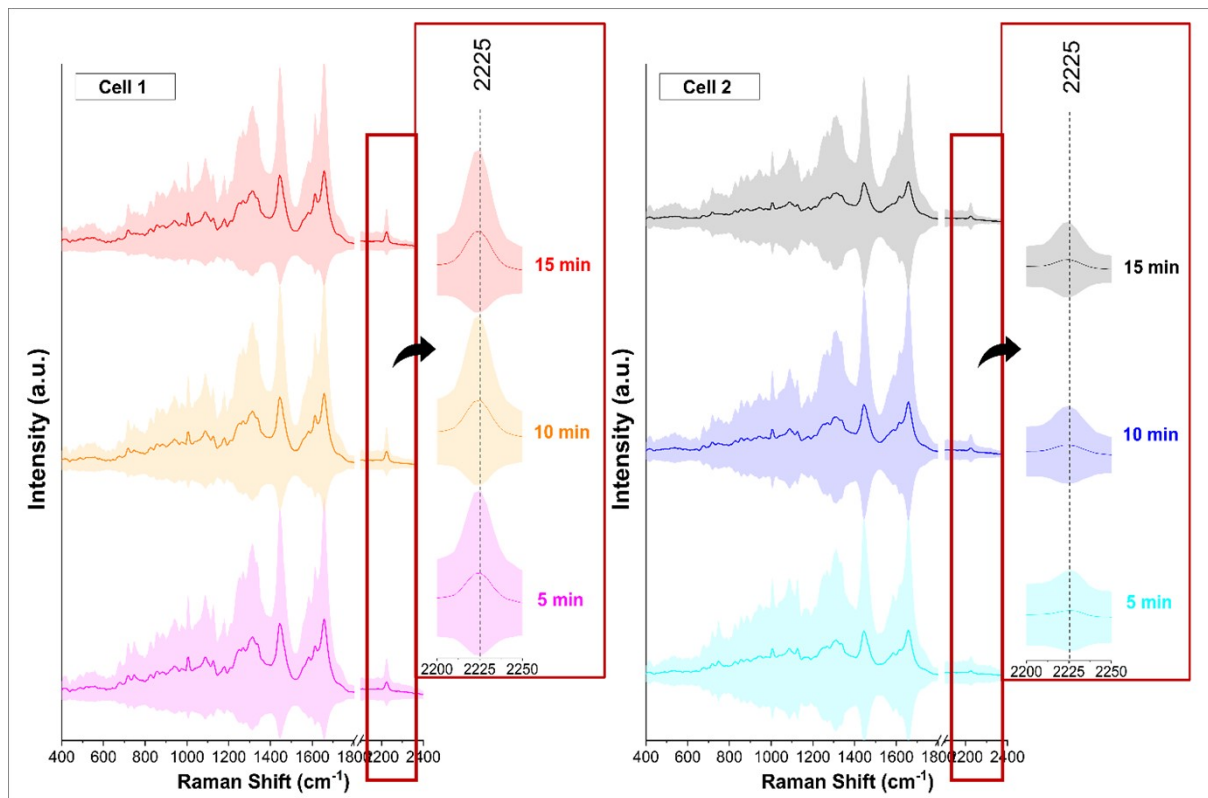

**Fig. S2.** The variability of Raman spectra from the perinuclear area of living cells presented in Fig. 3C. KMC spectra are presented together with the standard deviation (SD) of spectra averaged within perinuclear KMC group. SD is presented as a shadow on the spectra.

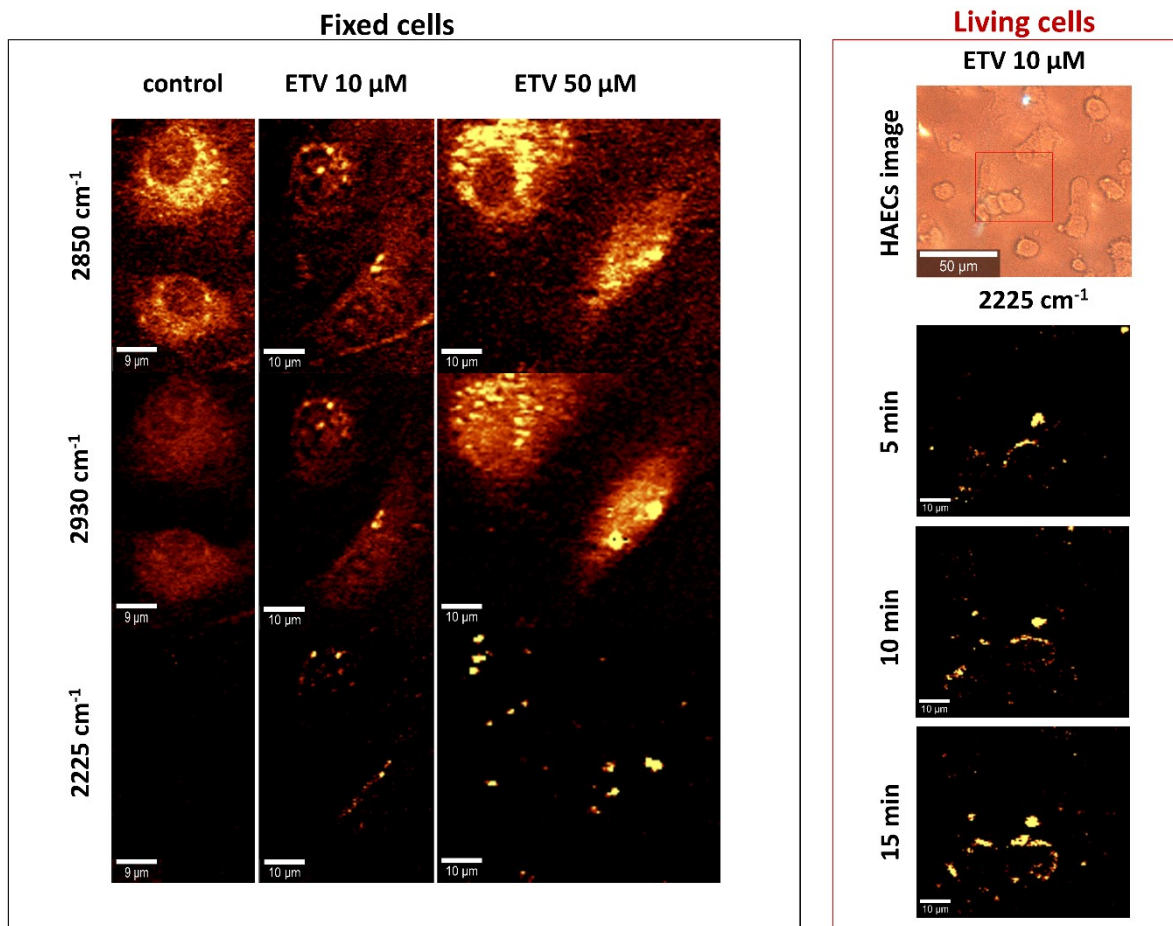

**Fig. S3. SRS images of ETV-treated cells in HAECs.** SRS images of fixed control and ETV-treated cells for 24 h (on the left) and SRS images of living cells capturing ETV uptake in time (cell treated with 10  $\mu\text{M}$  ETV and SRS spectra registered every 5 minutes for a 15-minute time-frame (on the right).

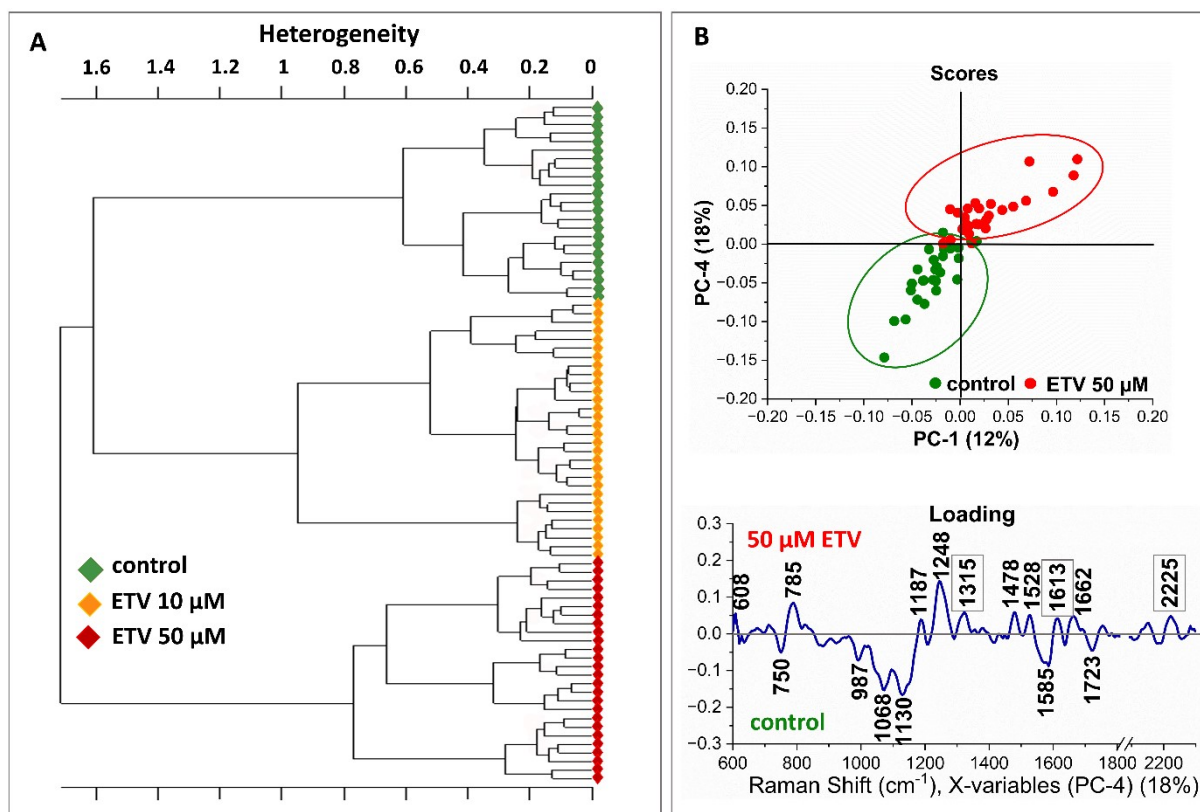

**Fig. S4. Chemometric analysis of perinuclear area extracted from control and ETV-treated HAECs by 24 hours.** A) HCA of average Raman spectra extracted from HAECs in KMCA (control, 10 and 50  $\mu$ M). B) PCA results for control cells and 50  $\mu$ M ETV-treated.
